# Supplementary material for: The Impact of Cancer-Associated Fibroblasts on the Biology and Progression of Colorectal Carcinomas
Source: MDPI journal article supplement (doi:10.3390/genes15020209), 2024-02-06
Supplement: s1 [file s1]

Table S1: Clinicopathological data of the cohort.

|                     |                  |     |                   |    |                        |               |    |
|---------------------|------------------|-----|-------------------|----|------------------------|---------------|----|
| <b>age</b>          | Min.             | 15  | <b>TNM-Status</b> |    | <b>Mutation Status</b> | (K/H/N) - RAS | 9  |
|                     | Median           | 65  | <b>T</b>          |    |                        | PIK3CA        | 7  |
|                     | Max.             | 94  | T1                | 9  |                        | TP53          | 19 |
| <b>sex</b>          | Male             | 76  | T2                | 9  |                        | HER2          | 1  |
|                     | Female           | 79  | T3                | 38 |                        | BRAF          | 16 |
| <b>type</b>         | CRC              | 65  | T4                | 7  |                        | TGFB          | 3  |
|                     | Adenom           | 37  | <b>N</b>          |    | <b>MSI</b>             | stable        | 12 |
|                     | Inflammation     | 20  | N0                | 38 |                        | high          | 10 |
|                     | Control          | 33  | N1                | 14 |                        |               |    |
|                     | Total            | 155 | N2                | 9  |                        |               |    |
| <b>Lokalisation</b> | descendens       | 32  | <b>M</b>          |    |                        |               |    |
|                     | ascendens        | 44  | M0                | 22 |                        |               |    |
|                     | sigma            | 40  | M1                | 12 |                        |               |    |
|                     | transversum      | 13  | <b>grade</b>      |    |                        |               |    |
|                     | Rektum           | 21  | G1                | 2  |                        |               |    |
|                     | coecum           | 3   | G2                | 52 |                        |               |    |
|                     | Flexura Hepatica | 2   | G3                | 15 |                        |               |    |

Table S2: Genes included in the CCP3 panel for next-generation sequencing

| <b>GENE</b>   | <b>EXON</b>          |
|---------------|----------------------|
| <i>BRAF</i>   | 11, 15               |
| <i>EGFR</i>   | 18-21                |
| <i>ERBB2</i>  | 2, 3, 12, 17, 20, 26 |
| <i>FGFR1</i>  | 3, 7, 13, 17         |
| <i>FGFR3</i>  | 7, 9                 |
| <i>HRAS</i>   | 2-4                  |
| <i>IDH1</i>   | 4                    |
| <i>KIT</i>    | 9-11, 13, 17, 18     |
| <i>KRAS</i>   | 2-4                  |
| <i>MET</i>    | 3, 8, 11, 14, 19     |
| <i>NRAS</i>   | 2-4                  |
| <i>PDGFRA</i> | 12, 14, 18           |
| <i>PIK3CA</i> | 3, 5, 10, 16, 21     |
| <i>RET</i>    | 7, 10, 11, 13-16     |
| <i>STK11</i>  | 1-9                  |
| <i>TP53</i>   | 2-11                 |

Table S3: Differences in gene expression between tumors with and without infiltration of FAP positive CAFs. Significant correlations are indicated by an FDR-corrected p-Value of < 0.05. The confidence interval (CI) indicates whether the genes are highly expressed in tumors (negative) or whether they are down-regulated (positive).

| Gene          | p-Value | FDR adjusted p-Values | lower CI | higher CI |
|---------------|---------|-----------------------|----------|-----------|
| <i>FN1</i>    | 0.0008  | 0.018                 | -10591   | -1820     |
| <i>FAP</i>    | 0.0002  | 0.007                 | -556     | -168      |
| <i>TGFB1</i>  | 0.0059  | 0.04                  | -901     | -164      |
| <i>TGFBR1</i> | 0.0028  | 0.035                 | -500.9   | -130.6    |
| <i>CDK1</i>   | 0.006   | 0.04                  | -418     | -93       |
| <i>CDK4</i>   | 0.0047  | 0.04                  | -423.6   | -92.5     |
| <i>WNT2</i>   | 0.0036  | 0.038                 | -185     | -46       |
| <i>WNT3</i>   | 0.0086  | 0.049                 | -28      | -4        |
| <i>EGFR</i>   | 0.0055  | 0.04                  | 36       | 165       |
| <i>FZD5</i>   | 0.001   | 0.018                 | 97       | 316.5     |
| <i>SOS2</i>   | 0.0016  | 0.024                 | 120.8    | 403.6     |
| <i>PIK3R1</i> | 0.0001  | 0.006                 | 377      | 800       |
| <i>PTEN</i>   | 0.0075  | 0.046                 | 152.1    | 824       |

Table S4: Correlation analysis of gene expression compared to FAP positivity (in %). Only correlations considered significant are displayed. One measure of evidence is an FDR-corrected p-Value of < 0.05. The Spearman's rank correlation coefficient (Rho) describes whether the genes are directly or in-directly associated with one another.

| Gene          | p-Value (Spearman) | FDR adjusted p values (Spearman) | Rho   |
|---------------|--------------------|----------------------------------|-------|
| <i>PIK3R1</i> | 3.00E-04           | 0.00814                          | -0.39 |
| <i>SMAD4</i>  | 0.00086            | 0.01332                          | -0.37 |
| <i>ARAF</i>   | 9.00E-04           | 0.01332                          | -0.36 |
| <i>BECN1</i>  | 0.0057             | 0.046866667                      | -0.31 |
| <i>SOS2</i>   | 0.0051             | 0.046866667                      | -0.31 |
| <i>WNT2</i>   | 0.0047             | 0.046866667                      | 0.31  |
| <i>TGFB1</i>  | 0.002              | 0.024666667                      | 0.34  |
| <i>FN1</i>    | 0.00033            | 0.00814                          | 0.39  |
| <i>FAP</i>    | 6.40E-06           | 0.0004736                        | 0.48  |

Table S5: Correlation analysis of gene expression and IRS score in FAP-positive samples. Only correlations considered significant are displayed. One measure of evidence is an FDR-corrected p-Value of < 0.05. The Spearman's rank correlation coefficient (Rho) describes whether the genes are directly or indirectly associated with one another.

| Gene                                   | p-Value<br>(Spearman) | FDR adjusted<br>p-values<br>(Spearman) | Rho   |
|----------------------------------------|-----------------------|----------------------------------------|-------|
| Intensity FAP (0 - 3)<br><i>PIK3R1</i> | 0.00051               | 0.011963333                            | -0.38 |
| Intensity FAP (0 - 3)<br><i>ARAF</i>   | 0.00074               | 0.011963333                            | -0.37 |
| Intensity FAP (0 - 3)<br><i>SMAD4</i>  | 0.0018                | 0.019028571                            | -0.35 |
| Intensity FAP (0 - 3)<br><i>BECN1</i>  | 0.0045                | 0.041625                               | -0.32 |
| Intensity FAP (0 - 3)<br><i>EGFR</i>   | 0.0052                | 0.042755556                            | -0.31 |
| Intensity FAP (0 - 3)<br><i>TGFB1</i>  | 0.00097               | 0.011963333                            | 0.36  |
| Intensity FAP (0 - 3)<br><i>WNT2</i>   | 0.00082               | 0.011963333                            | 0.37  |
| Intensity FAP (0 - 3)<br><i>FN1</i>    | 0.00043               | 0.011963333                            | 0.39  |
| Intensity FAP (0 - 3)<br><i>FAP</i>    | 0.0000073             | 0.0005402                              | 0.48  |

Table S6: Differential gene expression patterns between CRC and their precursor lesions. An FDR-corrected p-value of < 0.05 describes a significant correlation. The confidence interval (CI) indicates whether the genes are highly expressed in CRC (positive) or whether they are down-regulated (negative).

| Gene         | p-Value  | FDR adjusted<br>p-Values | lower CI | higher CI |
|--------------|----------|--------------------------|----------|-----------|
| <i>PTEN</i>  | 0.00045  | 0.006                    | -732.8   | -220.6    |
| <i>SMAD4</i> | 0.00019  | 0.004                    | -492.5   | -172.8    |
| <i>FZD5</i>  | 0.0022   | 0.012                    | -280.1   | -66.4     |
| <i>ATG14</i> | 0.0021   | 0.012                    | -203     | -52       |
| <i>NRAS</i>  | 0.0031   | 0.015                    | -192     | -44       |
| <i>EGFR</i>  | 0.00081  | 0.007                    | -138     | -42       |
| <i>BRAF</i>  | 0.0099   | 0.046                    | -197     | -30       |
| <i>WNT3</i>  | 0.00013  | 0.003                    | 9        | 24        |
| <i>FLT4</i>  | 0.00031  | 0.005                    | 17       | 57        |
| <i>PDGFB</i> | 0.0016   | 0.012                    | 27       | 110       |
| <i>TGFB1</i> | 0.002    | 0.012                    | 91.6     | 383.2     |
| <i>FAP</i>   | 0.0022   | 0.012                    | 87       | 387       |
| <i>CCND1</i> | 0.00083  | 0.007                    | 116      | 394       |
| <i>TGFB1</i> | 0.00068  | 0.007                    | 209      | 781       |
| <i>VEGFA</i> | 2.40E-05 | 0.001                    | 468      | 1761      |
| <i>FN1</i>   | 4.70E-06 | 0.0003                   | 2487     | 8173      |

Table S7: Gene set enrichment analysis of differentially expressed genes based on FAP positivity. Fibroblast positivity (based on FAP expression) correlates with pathways displaying a lower or negative enrichment score (FDR-corrected p-Value < 0,05). Geneset size indicates the number of genes involved in certain pathways, and the leading-edge number represents the number of genes affected by CAF infiltration. Userid is HUGO Gene names of the affected genes.

| description                                              | normalized Enrichment Score | pValue      | geneset size | leadingEdgeNr. | userid                                                                                                                |
|----------------------------------------------------------|-----------------------------|-------------|--------------|----------------|-----------------------------------------------------------------------------------------------------------------------|
| Insulin signaling pathway                                | -2.218248174                | 0           | 17           | 11             | ARAF; BRAF; KRAS; MAP2K2; MAPK1; MTOR; PIK3R1; RAF1; RPS6KB1; RPTOR; SOS2                                             |
| Autophagy                                                | -2.318831305                | 0           | 18           | 16             | AKT1; ATG14; BECN1; HRAS; KRAS; MAP2K2; MAPK1; MTOR; NRAS; PIK3C3; PIK3R1; PIK3R4; PTEN; RAF1; RPS6KB1; RPTOR         |
| Hepatitis C                                              | -2.027314468                | 0           | 16           | 15             | AKT1; ARAF; BRAF; CDKN1A; EGFR; HRAS; KRAS; MAPK1; NRAS; PIK3CA; PIK3R1; RAF1; SOS1; SOS2; TP53                       |
| ErbB signaling pathway                                   | -2.027602351                | 0           | 22           | 13             | ARAF; BRAF; CDKN1B; EGFR; KRAS; MAP2K2; MAPK1; MTOR; PIK3R1; RAF1; RPS6KB1; SOS1; SOS2                                |
| Natural killer cell mediated cytotoxicity                | -1.929263525                | 0.002444988 | 13           | 10             | ARAF; BRAF; KRAS; MAP2K2; MAPK1; NRAS; PIK3R1; RAF1; SOS1; SOS2                                                       |
| Neurotrophin signaling pathway                           | -1.878304451                | 0.014251781 | 14           | 13             | AKT1; BRAF; HRAS; KRAS; MAP2K2; MAPK1; NRAS; PIK3CA; PIK3R1; RAF1; SOS1; SOS2; TP53                                   |
| B cell receptor signaling pathway                        | -1.769902867                | 0.018018018 | 12           | 10             | AKT1; HRAS; KRAS; MAP2K2; MAPK1; NRAS; PIK3R1; RAF1; SOS1; SOS2                                                       |
| Fc epsilon RI signaling pathway                          | -1.769902867                | 0.018018018 | 12           | 10             | AKT1; HRAS; KRAS; MAP2K2; MAPK1; NRAS; PIK3R1; RAF1; SOS1; SOS2                                                       |
| Estrogen signaling pathway                               | -1.74926145                 | 0.016166282 | 14           | 11             | AKT1; EGFR; HRAS; KRAS; MAP2K2; MAPK1; NRAS; PIK3R1; RAF1; SOS1; SOS2                                                 |
| Sphingolipid signaling pathway                           | -1.671694848                | 0.014150943 | 12           | 6              | KRAS; MAP2K2; MAPK1; PIK3R1; PTEN; RAF1                                                                               |
| Hippo signaling pathway                                  | 1.38342469                  | 0.101666666 | 15           | 8              | CCND1; FZD10; FZD2; MYC; TGFB1; WNT1; WNT2; WNT3                                                                      |
| Melanogenesis                                            | 1.456815046                 | 0.06187291  | 14           | 5              | FZD10; FZD2; WNT1; WNT2; WNT3                                                                                         |
| Wnt signaling pathway                                    | 1.534000475                 | 0.048657718 | 11           | 7              | CCND1; FZD10; FZD2; MYC; WNT1; WNT2; WNT3                                                                             |
| Human T-cell leukemia virus 1 infection                  | 1.190115595                 | 0.245033112 | 25           | 9              | CCND1; FZD10; FZD2; MYC; PDGFB; TGFB1; WNT1; WNT2; WNT3                                                               |
| Signaling pathways regulating pluripotency of stem cells | 0.878652446                 | 0.622366287 | 21           | 5              | FZD10; FZD2; WNT1; WNT2; WNT3                                                                                         |
| Pathways in cancer                                       | 0.917481873                 | 0.579288025 | 52           | 19             | CCND1; CCNE1; CDK4; FGF7; FLT4; FN1; FZD10; FZD2; IGF1; MET; MYC; PDGFB; TGFB1; TGFB1; VEGFA; VEGFC; WNT1; WNT2; WNT3 |
| Human papillomavirus infection                           | 0.95703373                  | 0.519561815 | 36           | 7              | FN1; FZD10; FZD2; VEGFA; WNT1; WNT2; WNT3                                                                             |
| PI3K-Akt signaling pathway                               | 0.525922657                 | 0.987361768 | 41           | 16             | CCND1; CCNE1; CDK4; FGF7; FLT1; FLT4; FN1; HGF; IGF1; KDR; MET; MYC; PDGFB; PIK3R5; VEGFA; VEGFC                      |
| p53 signaling pathway                                    | 1.025798497                 | 0.432907348 | 12           | 5              | CCND1; CCNE1; CDK1; CDK4; IGF1                                                                                        |
| Cushing syndrome                                         | 1.022306791                 | 0.451199999 | 20           | 7              | CCND1; CCNE1; FZD10; FZD2; WNT1; WNT2; WNT3                                                                           |

Table S8: Gene set enrichment analysis in FAP-positive fibroblast samples differentiated by low and high FAP expression (%) (FDR-corrected p-Value < 0,05). Geneset size indicates the number of genes involved in certain pathways, and the leading-edge number represents the number of genes affected by the percentage of FAP positive infiltrating CAFs. UserId is HUGO Gene names of the affected genes. A high enrichment score correlates with low FAP expression.

| description                                     | normalized Enrichment Score | pValue      | size | leadingEdgeNum | userId                                                                        |
|-------------------------------------------------|-----------------------------|-------------|------|----------------|-------------------------------------------------------------------------------|
| Cell cycle                                      | 2.060687849                 | 0           | 17   | 9              | CCNA2;CCND1;CDK1;CDK4;CDKN1A;CDKN2A;MDM2;MYC;TP53                             |
| Viral carcinogenesis                            | 1.820922472                 | 0           | 18   | 10             | CCNA2;CCND1;CDK1;CDK4;CDKN1A;CDKN2A;HRAS;MDM2;NRAS;TP53                       |
| Small cell lung cancer                          | 1.518634715                 | 0.072164948 | 14   | 5              | CCND1;CDK4;FN1;MYC;TP53                                                       |
| Bladder cancer                                  | 1.376252411                 | 0.072463768 | 19   | 10             | CCND1;CDK4;CDKN1A;CDKN2A;EGFR;HRAS;MDM2;MYC;NRAS;TP53                         |
| p53 signaling pathway                           | 1.338108497                 | 0.093596059 | 12   | 7              | CCND1;CDK1;CDK4;CDKN1A;CDKN2A;MDM2;TP53                                       |
| Thyroid cancer                                  | 1.429520126                 | 0.070422535 | 12   | 6              | CCND1;CDKN1A;HRAS;MYC;NRAS;TP53                                               |
| MicroRNAs in cancer                             | 1.377879771                 | 0.076923076 | 29   | 12             | ABCB1;CCND1;CDKN1A;CDKN2A;EGFR;HRAS;MDM2;MET;MYC;NRAS;TP53;WNT3               |
| Cellular senescence                             | 1.279280854                 | 0.111111111 | 28   | 10             | CCNA2;CCND1;CDK1;CDK4;CDKN1A;CDKN2A;MDM2;MYC;NRAS;TP53                        |
| Epstein-Barr virus infection                    | 1.211495306                 | 0.184049079 | 15   | 7              | CCNA2;CCND1;CDK4;CDKN1A;MDM2;MYC;TP53                                         |
| Human T-cell leukemia virus 1 infection         | 1.165925781                 | 0.225490194 | 25   | 6              | CCND1;CDK4;CDKN2A;MYC;TP53;WNT3                                               |
| Rap1 signaling pathway                          | -1.704657678                | 0.003329634 | 24   | 13             | AKT1;BRAF;EGF;FGF7;FLT4;HGF;IGF1;PDGFB;PIK3CA;PIK3R1;RAF1;VEGFA;VEGFC         |
| Ras signaling pathway                           | -1.625504811                | 0.006644518 | 26   | 14             | AKT1;EGF;FGF7;FLT4;HGF;IGF1;PDGFB;PIK3CA;PIK3R1;RAF1;SOS1;SOS2;VEGFA;VEGFC    |
| Relaxin signaling pathway                       | -1.429591112                | 0.065142857 | 20   | 11             | ACTA2;AKT1;PIK3CA;PIK3R1;RAF1;SOS1;SOS2;TGFB1;TGFB2;VEGFA;VEGFC               |
| Chemokine signaling pathway                     | -1.394916662                | 0.088779285 | 13   | 8              | AKT1;BRAF;PIK3CA;PIK3R1;PIK3R5;RAF1;SOS1;SOS2                                 |
| MAPK signaling pathway                          | -1.44404783                 | 0.045209903 | 31   | 15             | AKT1;BRAF;EGF;FGF7;FLT4;HGF;IGF1;PDGFB;RAF1;SOS1;SOS2;TGFB1;TGFB2;VEGFA;VEGFC |
| Endometrial cancer                              | -0.634626975                | 0.897377422 | 22   | 8              | AKT1;BRAF;EGF;PIK3CA;PIK3R1;RAF1;SOS1;SOS2                                    |
| Endocrine resistance                            | -0.509521765                | 0.969525958 | 25   | 8              | AKT1;BRAF;IGF1;PIK3CA;PIK3R1;RAF1;SOS1;SOS2                                   |
| Non-small cell lung cancer                      | -0.543105469                | 0.96158192  | 23   | 8              | AKT1;BRAF;EGF;PIK3CA;PIK3R1;RAF1;SOS1;SOS2                                    |
| Kaposi sarcoma-associated herpesvirus infection | -0.66033779                 | 0.891525423 | 24   | 8              | AKT1;ATG14;PDGFB;PIK3CA;PIK3R1;PIK3R5;RAF1;VEGFA                              |
| Human papillomavirus infection                  | -0.563261658                | 0.959826275 | 36   | 6              | EGF;FZD2;RAF1;SOS2;VEGFA;WNT1                                                 |

Table S9: Gene set enrichment in dependence of high and low FAP staining intensity (FDR-corrected  $p$ -Value < 0,05). Geneset size indicates the number of genes involved in certain pathways, and the leading-edge number represents the number of genes affected by the strength of staining. UserId is HUGO Gene names of the affected genes. A high enrichment score correlates with low FAP ex-expression.

| description                              | normalizedEnrichmentScore | pValue      | size | leadingEdgeNum | userId                                                                                  |
|------------------------------------------|---------------------------|-------------|------|----------------|-----------------------------------------------------------------------------------------|
| Alcoholism                               | 1.295483762               | 0.179710144 | 10   | 4              | ARAF;BRAF;HRAS;SOS2                                                                     |
| Insulin signaling pathway                | 1.586636707               | 0.028880866 | 17   | 13             | AKT1;ARAF;BRAF;HRAS;MAP2K2;MTOR;NRAS;PIK3R1;RAF1;RPS6KB1;RPTOR;SOS1;SOS2                |
| Choline metabolism in cancer             | 1.302049466               | 0.156934306 | 17   | 12             | AKT1;EGF;EGFR;HRAS;MAP2K2;MTOR;NRAS;PIK3R1;RAF1;RPS6KB1;SOS1;SOS2                       |
| Autophagy                                | 1.642591454               | 0.015564202 | 18   | 14             | AKT1;ATG14;BECN1;HRAS;MAP2K2;MTOR;NRAS;PIK3C3;PIK3R1;PIK3R4;PTEN;RAF1;RPS6KB1;RPTOR     |
| Endometrial cancer                       | 1.307174347               | 0.137440758 | 22   | 16             | AKT1;ARAF;BRAF;CTNNB1;EGF;EGFR;HRAS;MAP2K2;MYC;NRAS;PIK3R1;PTEN;RAF1;SOS1;SOS2;TP53     |
| Human immunodeficiency virus 1 infection | 1.312997347               | 0.134730539 | 14   | 10             | AKT1;CDK1;HRAS;MAP2K2;MTOR;NRAS;PIK3R1;RAF1;RPS6KB1;WEE1                                |
| Acute myeloid leukemia                   | 1.437251703               | 0.078947368 | 18   | 16             | AKT1;ARAF;BRAF;CCND1;HRAS;KRAS;MAP2K2;MAPK1;MTOR;MYC;NRAS;PIK3R1;RAF1;RPS6KB1;SOS1;SOS2 |
| Estrogen signaling pathway               | 1.342310725               | 0.11295681  | 14   | 10             | AKT1;EGFR;HRAS;MAP2K2;NRAS;PIK3R1;RAF1;SOS1;SOS2;TGFA                                   |
| Neurotrophin signaling pathway           | 1.318408432               | 0.154838709 | 14   | 10             | AKT1;BRAF;HRAS;MAP2K2;NRAS;PIK3R1;RAF1;SOS1;SOS2;TP53                                   |
| Hepatitis C                              | 1.467101014               | 0.073170731 | 16   | 9              | ARAF;BRAF;EGF;EGFR;HRAS;NRAS;PIK3R1;SOS2;TP53                                           |
| Prostate cancer                          | -0.408804629              | 0.99512195  | 29   | 4              | CCNE1;CDKN1A;IGF1;MDM2                                                                  |
| Rap1 signaling pathway                   | -1.331480256              | 0.131313131 | 24   | 4              | FGF7;FLT1;IGF1;VEGFA                                                                    |
| PI3K-Akt signaling pathway               | -1.267537648              | 0.151724138 | 41   | 11             | CCNE1;CDKN1A;FGF7;FLT1;FLT4;FN1;IGF1;MDM2;PDGFB;VEGFA;VEGFC                             |
| Pathways in cancer                       | -1.241189518              | 0.155133928 | 52   | 15             | CCNE1;CDKN1A;FGF7;FLT4;FN1;FZD10;IGF1;MDM2;PDGFB;SMAD2;TGFB1;VEGFA;VEGFC;WNT2;WNT3      |
| Ras signaling pathway                    | -1.269453968              | 0.181034483 | 26   | 4              | FGF7;FLT1;IGF1;VEGFA                                                                    |
| HIF-1 signaling pathway                  | -1.152908038              | 0.291371994 | 15   | 4              | CDKN1A;FLT1;IGF1;VEGFA                                                                  |
| Focal adhesion                           | -1.145961837              | 0.294416243 | 25   | 4              | FLT1;FN1;IGF1;VEGFA                                                                     |
| MAPK signaling pathway                   | -1.162580965              | 0.295159386 | 31   | 5              | FGF7;FLT1;IGF1;TGFB1;VEGFA                                                              |
| Small cell lung cancer                   | -1.144507168              | 0.332378223 | 14   | 3              | CCNE1;CDKN1A;FN1                                                                        |
| Regulation of actin cytoskeleton         | -1.127849105              | 0.360323886 | 19   | 2              | FGF7;FN1                                                                                |
|                                          |                           |             |      |                |                                                                                         |

Table S10: Gene set enrichment analysis differentiated by adenoma and CRC samples in conjunction with CAFs. Geneset size indicates the number of genes involved in certain pathways, and the lead-ing-edge number represents the number of genes affected by differents between CRC and its pre-cursor lesions. UserId is HUGO Gene names of the affected genes. A high enrichment score corre-lates with low FAP expression.

| description                               | normalized Enrichment Score | pValue      | size | leadingEdgeNum | userId                                                                    |
|-------------------------------------------|-----------------------------|-------------|------|----------------|---------------------------------------------------------------------------|
| Autophagy                                 | 2.513204059                 | 0           | 18   | 12             | ATG14;BECN1;KRAS;MAPK1;MTOR;NRAS;PIK3C3;PIK3CA;PIK3R1;PIK3R4;PTEN;RPS6KB1 |
| Natural killer cell mediated cytotoxicity | 1.963040832                 | 0.008403361 | 13   | 8              | ARAF;BRAF;KRAS;MAPK1;NRAS;PIK3CA;PIK3R1;SOS2                              |
| Insulin signaling pathway                 | 1.880673818                 | 0.023255814 | 17   | 10             | ARAF;BRAF;KRAS;MAPK1;MTOR;NRAS;PIK3CA;PIK3R1;RPS6KB1;SOS2                 |
| Hepatitis C                               | 2.004446534                 | 0           | 16   | 11             | ARAF;BRAF;EGF;EGFR;KRAS;MAPK1;NRAS;PIK3CA;PIK3R1;SOS2;TP53                |
| Sphingolipid signaling pathway            | 1.596969297                 | 0.022727273 | 12   | 7              | KRAS;MAPK1;NRAS;PIK3CA;PIK3R1;PTEN;TP53                                   |
| GnRH signaling pathway                    | 1.613668525                 | 0.032894737 | 10   | 5              | EGFR;KRAS;MAPK1;NRAS;SOS2                                                 |
| Alcoholism                                | 1.643122535                 | 0.014388489 | 10   | 6              | ARAF;BRAF;KRAS;MAPK1;NRAS;SOS2                                            |
| Neurotrophin signaling pathway            | 1.671410748                 | 0.01        | 14   | 8              | BRAF;KRAS;MAPK1;NRAS;PIK3CA;PIK3R1;SOS2;TP53                              |
| Apoptosis                                 | 1.390169562                 | 0.111888111 | 11   | 6              | KRAS;MAPK1;NRAS;PIK3CA;PIK3R1;TP53                                        |
| Estrogen signaling pathway                | 1.407590573                 | 0.097345132 | 14   | 6              | EGFR;MAPK1;NRAS;PIK3CA;PIK3R1;SOS2                                        |
| Glioma                                    | -0.369328686                | 0.998957246 | 28   | 5              | CCND1;CDKN2A;IGF1;PDGFB;TGFA                                              |
| Focal adhesion                            | -1.214633334                | 0.198544698 | 25   | 5              | FLT4;FN1;IGF1;PDGFB;VEGFA                                                 |
| Pathways in cancer                        | -1.175024319                | 0.237563452 | 52   | 14             | CCND1;CDKN2A;FGF7;FLT4;FN1;FZD2;IGF1;MYC;PDGFB;TGFB1;VEGFA;WNT1;WNT2;WNT3 |
| Hippo signaling pathway                   | -1.21119303                 | 0.241758241 | 15   | 9              | CCND1;CTNNB1;FZD2;MYC;TGFB1;TGFB1;WNT1;WNT2;WNT3                          |
| Wnt signaling pathway                     | -1.212144996                | 0.268208092 | 11   | 6              | CCND1;FZD2;MYC;WNT1;WNT2;WNT3                                             |
| Regulation of actin cytoskeleton          | -1.182308846                | 0.274074074 | 19   | 3              | FGF7;FN1;PDGFB                                                            |
| Rap1 signaling pathway                    | -1.153635658                | 0.291886196 | 24   | 5              | FGF7;FLT4;IGF1;PDGFB;VEGFA                                                |
| Human T-cell leukemia virus 1 infection   | -1.157663441                | 0.294614572 | 25   | 9              | CCND1;CDKN2A;FZD2;MYC;PDGFB;TGFB1;WNT1;WNT2;WNT3                          |
| Ras signaling pathway                     | -1.139177666                | 0.316821465 | 26   | 5              | FGF7;FLT4;IGF1;PDGFB;VEGFA                                                |
| Proteoglycans in cancer                   | -1.110664814                | 0.341438703 | 38   | 10             | CCND1;FN1;FZD2;IGF1;MYC;TGFB1;VEGFA;WNT1;WNT2;WNT3                        |
